# Supplementary material
Source: PubMed Central journal article supplement (PMC3793624)
Supplement: supp_P042077_jlr.P042077-1.pdf [file supp_P042077_jlr.P042077-1.pdf]

**Table S1.** Full gene names corresponding to gene symbols

| <b>Gene symbol <sup>a</sup></b> | <b>Gene full name</b>                                                                                                        |
|---------------------------------|------------------------------------------------------------------------------------------------------------------------------|
| <i>ABCA1</i>                    | ATP-binding cassette, sub-family A (ABC1), member 1                                                                          |
| <i>ABO</i>                      | ABO blood group (transferase A, alpha 1-3-N-acetylgalactosaminyltransferase; transferase B, alpha 1-3-galactosyltransferase) |
| <i>ANGPTL3</i>                  | angiopoietin-like 3                                                                                                          |
| <i>APOA5</i>                    | apolipoprotein A-V                                                                                                           |
| <i>APOB</i>                     | apolipoprotein B                                                                                                             |
| <i>APOE</i>                     | apolipoprotein E                                                                                                             |
| <i>CETP</i>                     | cholesteryl ester transfer protein, plasma                                                                                   |
| <i>DNAH11</i>                   | dynein, axonemal, heavy chain 11                                                                                             |
| <i>GCKR</i>                     | glucokinase (hexokinase 4) regulator                                                                                         |
| <i>HECTD4</i>                   | HECT domain containing E3 ubiquitin protein ligase 4                                                                         |
| <i>LIPC</i>                     | lipase, hepatic                                                                                                              |
| <i>LIPG</i>                     | lipase, endothelial                                                                                                          |
| <i>LPL</i>                      | lipoprotein lipase                                                                                                           |
| <i>MLXIPL</i>                   | MLX interacting protein-like                                                                                                 |
| <i>MMAB</i>                     | methylmalonic aciduria (cobalamin deficiency) cblB type                                                                      |
| <i>MVK</i>                      | mevalonate kinase                                                                                                            |
| <i>MYL2</i>                     | myosin, light chain 2, regulatory, cardiac, slow                                                                             |
| <i>TIMD4</i>                    | T-cell immunoglobulin and mucin domain containing 4                                                                          |
| <i>TOM1</i>                     | target of myb1                                                                                                               |
| <i>TRIB1</i>                    | tribbles homolog 1                                                                                                           |

<sup>a</sup> Loci are referred to by gene symbols for genes located at or near the lipid-associated variants.
