# Supplementary material
Source: PubMed Central journal article supplement (PMC3793624)
Supplement: supp_P042077_jlr.P042077-2.pdf [file supp_P042077_jlr.P042077-2.pdf]

**Table S2.** Associations of lipid traits with potential covariates, including 10 principal components of population substructure

| Potential covariates <sup>a</sup>                       | <i>P</i> <sub>TG</sub> | <i>P</i> <sub>HDL-C</sub> | <i>P</i> <sub>LDL-C</sub> | <i>P</i> <sub>TC</sub> |
|---------------------------------------------------------|------------------------|---------------------------|---------------------------|------------------------|
| Age <sup>b</sup>                                        | 3.3E-10                | 0.014                     | 3.5E-08                   | 6.6E-10                |
| Age <sup>2</sup> <sup>b</sup>                           | 9.6E-05                | 0.35                      | 1.2E-04                   | 1.6E-05                |
| Household assets <sup>b</sup>                           | 1.0E-09                | 2.0E-08                   | 1.3E-12                   | 8.0E-24                |
| Household income (Natural log-transformed) <sup>b</sup> | 9.5E-06                | 1.9E-03                   | 6.9E-05                   | 6.2E-11                |
| Menopausal status <sup>c</sup>                          | 0.095                  | 0.035                     | 0.066                     | 0.15                   |
| Smoking <sup>c</sup>                                    | 9.6E-02                | 1.3E-03                   | 0.031                     | 0.023                  |
| Type 2 diabetes <sup>b</sup>                            | 6.4E-22                | 0.16                      | 0.084                     | 1.3E-06                |
| Principal components of population structure            |                        |                           |                           |                        |
| PC1 <sup>b</sup>                                        | 0.55                   | 4.1E-05                   | 0.050                     | 5.7E-03                |
| PC2 <sup>b</sup>                                        | 0.12                   | 3.4E-03                   | 0.069                     | 0.91                   |
| PC3 <sup>b</sup>                                        | 0.19                   | 0.015                     | 0.97                      | 0.97                   |
| PC4 <sup>b</sup>                                        | 0.16                   | 0.70                      | 0.43                      | 0.87                   |
| PC5 <sup>b</sup>                                        | 0.29                   | 0.26                      | 0.50                      | 0.59                   |
| PC6 <sup>b</sup>                                        | 0.61                   | 0.20                      | 0.018                     | 0.016                  |
| PC7 <sup>b</sup>                                        | 0.78                   | 0.022                     | 0.34                      | 0.17                   |
| PC8                                                     | 0.85                   | 0.50                      | 0.36                      | 0.21                   |
| PC9                                                     | 0.51                   | 0.29                      | 0.97                      | 0.98                   |
| PC10                                                    | 0.18                   | 0.44                      | 0.39                      | 0.33                   |

<sup>a</sup> Age was associated with increased TG, LDL-C and TC, and decreased HDL-C;  
Household assets and household income were positively associated with all four traits;  
Post-menopausal status was marginally associated with increased TG and LDL-C, and decreased HDL-C;  
Current smoking was marginally associated with increased TG, but decreased HDL-C, LDL-C and TC;  
Type 2 diabetes was associated with increased TG, LDL-C and TC, and decreased HDL-C.

<sup>b</sup> Covariates initially used in Model 1 in the CLHNS mothers.

<sup>c</sup> Additional covariates applied for Model 2 based on those having been included Model 1.
