# Supplementary material
Source: PubMed Central journal article supplement (PMC3793624)
Supplement: supp_P042077_jlr.P042077-3.pdf [file supp_P042077_jlr.P042077-3.pdf]

**Table S3.** SNP associations with lipid traits in CLHNS mothers after adjusting for other covariates <sup>a</sup>

| Locus           | SNP        | Trait | Model 1 <sup>b</sup> |      |          | Model 2 <sup>c</sup> |      |          | Model 3 <sup>d</sup> |      |          |
|-----------------|------------|-------|----------------------|------|----------|----------------------|------|----------|----------------------|------|----------|
|                 |            |       | $\beta$              | SE   | <i>P</i> | $\beta$              | SE   | <i>P</i> | $\beta$              | SE   | <i>P</i> |
| <i>APOA5</i>    | rs662799   | TG    | -0.18                | 0.02 | 3.1E-18  | -0.18                | 0.02 | 5.2E-19  | -0.19                | 0.02 | 2.8E-21  |
| <i>APOA5</i>    | rs3741297  | TG    | -0.31                | 0.07 | 3.1E-06  | -0.30                | 0.06 | 3.4E-06  | -0.31                | 0.06 | 2.4E-06  |
| <i>GCKR</i>     | rs780092   | TG    | 0.09                 | 0.02 | 1.6E-07  | 0.09                 | 0.02 | 8.4E-08  | 0.09                 | 0.02 | 4.6E-08  |
| <i>LPL</i>      | rs328      | TG    | 0.11                 | 0.04 | 7.9E-03  | 0.09                 | 0.04 | 2.8E-02  | 0.10                 | 0.04 | 1.2E-01  |
| <i>MLXIPL</i>   | rs17145738 | TG    | -0.05                | 0.03 | 7.7E-02  | -0.04                | 0.03 | 1.7E-01  | -0.05                | 0.03 | 5.9E-02  |
| <i>ANGPTL3</i>  | rs2131925  | TG    | 0.04                 | 0.02 | 3.6E-02  | 0.03                 | 0.02 | 1.2E-01  | 0.05                 | 0.02 | 9.0E-03  |
| <i>CETP</i>     | rs1800775  | HDL-C | 0.05                 | 0.01 | 6.3E-07  | 0.05                 | 0.01 | 6.3E-07  | 0.05                 | 0.01 | 1.0E-06  |
| <i>CETP</i>     | rs7499892  | HDL-C | 0.10                 | 0.02 | 1.9E-06  | 0.10                 | 0.02 | 2.7E-06  | 0.10                 | 0.02 | 1.2E-06  |
| <i>TOM1</i>     | rs138777   | HDL-C | 0.05                 | 0.01 | 5.0E-07  | 0.05                 | 0.01 | 9.9E-07  | 0.05                 | 0.01 | 3.0E-07  |
| <i>LIPC</i>     | rs588136   | HDL-C | -0.05                | 0.01 | 5.1E-06  | -0.05                | 0.01 | 5.5E-06  | -0.05                | 0.01 | 7.2E-06  |
| <i>LIPC</i>     | rs1532085  | HDL-C | -0.04                | 0.01 | 2.6E-04  | -0.04                | 0.01 | 1.8E-04  | -0.04                | 0.01 | 1.8E-04  |
| <i>LIPG</i>     | rs2156552  | HDL-C | -0.02                | 0.01 | 7.5E-02  | -0.02                | 0.01 | 1.0E-01  | -0.02                | 0.01 | 8.6E-02  |
| <i>MMAB-MVK</i> | rs10774708 | HDL-C | -0.02                | 0.01 | 7.6E-02  | -0.01                | 0.01 | 1.2E-01  | -0.02                | 0.01 | 6.0E-02  |
| <i>APOE</i>     | rs7412     | LDL-C | -0.48                | 0.04 | 1.6E-27  | -0.48                | 0.04 | 4.3E-27  | -0.48                | 0.04 | 2.3E-27  |
| <i>APOE</i>     | rs769449   | LDL-C | -0.48                | 0.22 | 3.2E-02  | -0.47                | 0.22 | 3.5E-02  | -0.49                | 0.22 | 2.7E-02  |
| <i>ABO</i>      | rs2519093  | LDL-C | -0.10                | 0.05 | 3.3E-02  | -0.10                | 0.05 | 3.8E-02  | -0.10                | 0.05 | 3.6E-02  |
| <i>APOB</i>     | rs1367117  | LDL-C | -0.09                | 0.05 | 4.7E-02  | -0.09                | 0.05 | 5.6E-02  | -0.10                | 0.05 | 3.2E-02  |
| <i>APOE</i>     | rs7412     | TC    | -0.08                | 0.01 | 1.8E-14  | -0.08                | 0.01 | 8.6E-14  | -0.08                | 0.01 | 3.5E-14  |
| <i>TIMD4</i>    | rs6882076  | TC    | 0.01                 | 0.01 | 6.0E-02  | 0.01                 | 0.01 | 4.5E-02  | 0.01                 | 0.01 | 4.6E-02  |
| <i>DNAH11</i>   | rs5008148  | TC    | 0.02                 | 0.01 | 7.2E-02  | 0.02                 | 0.01 | 5.6E-02  | 0.02                 | 0.01 | 1.6E-01  |

<sup>a</sup> Results are shown for SNPs in Tables 2-4.

<sup>b</sup> Model 1 was adjusted for age, age<sup>2</sup>, household assets, natural log transformed household income and PCs1-7.

<sup>c</sup> Model 2 was further adjusted for menopausal status, current smoking and type 2 diabetes status in addition to the covariates applied in Model 1.

<sup>d</sup> Model 3 was further adjusted for waist circumference in addition to the covariates applied in Model 1.
