# Supplementary material
Source: PubMed Central journal article supplement (PMC3793624)
Supplement: supp_P042077_jlr.P042077-4.pdf [file supp_P042077_jlr.P042077-4.pdf]

**Table S4.** Levels of lipid traits according to the quartiles of waist circumference

| Quartiles of waist circumference        | Mothers              |                      |                      |                      |                                        | Offspring            |                      |                      |                      |                                        |
|-----------------------------------------|----------------------|----------------------|----------------------|----------------------|----------------------------------------|----------------------|----------------------|----------------------|----------------------|----------------------------------------|
|                                         | Q1                   | Q2                   | Q3                   | Q4                   | <i>P</i> <sub>trend</sub> <sup>a</sup> | Q1                   | Q2                   | Q3                   | Q4                   | <i>P</i> <sub>trend</sub> <sup>a</sup> |
| <i>N</i>                                | 440                  | 442                  | 444                  | 443                  |                                        | 408                  | 412                  | 415                  | 416                  |                                        |
| Total cholesterol (mmol/L) <sup>b</sup> | 4.36<br>(3.79, 5.08) | 4.79<br>(4.14, 5.44) | 4.83<br>(4.30, 5.57) | 5.02<br>(4.33, 5.67) | < 0.0001                               | 3.91<br>(3.42, 4.53) | 3.89<br>(3.37, 4.43) | 3.76<br>(3.29, 4.30) | 4.20<br>(3.65, 4.82) | < 0.0001                               |
| HDL-cholesterol (mmol/L) <sup>c</sup>   | 1.08 ± 0.29          | 1.08 ± 0.27          | 1.04 ± 0.26          | 1.04 ± 0.25          | < 0.0001                               | 1.16 ± 0.31          | 1.11 ± 0.29          | 1.02 ± 0.24          | 1.05 ± 0.26          | 0.0011                                 |
| LDL-cholesterol (mmol/L) <sup>c</sup>   | 2.85 ± 0.85          | 3.13 ± 0.91          | 3.16 ± 0.82          | 3.23 ± 0.85          | < 0.0001                               | 2.42 ± 0.71          | 2.36 ± 0.64          | 2.26 ± 0.69          | 2.58 ± 0.82          | < 0.0001                               |
| Triglyceride (mmol/L) <sup>b</sup>      | 0.96<br>(0.77, 1.30) | 1.24<br>(0.94, 1.73) | 1.38<br>(1.03, 1.94) | 1.55<br>(1.11, 2.10) | < 0.0001                               | 0.86<br>(0.64, 1.14) | 0.90<br>(0.69, 1.17) | 1.03<br>(0.76, 1.39) | 1.23<br>(0.89, 1.78) | < 0.0001                               |

<sup>a</sup> *P*<sub>trend</sub>: adjusted for age, age<sup>2</sup>, household assets and household income in mothers; and for sex, household assets and household income in offspring.

<sup>b</sup> Data are median (25th percentile, 75th percentile).

<sup>c</sup> Data are mean ± SD.
