# Supplementary material
Source: PubMed Central journal article supplement (PMC3793624)
Supplement: supp_P042077_jlr.P042077-5.pdf [file supp_P042077_jlr.P042077-5.pdf]

**Table S5.** Interactions between SNP and waist circumference affecting lipid levels in the CLHNS mothers and offspring <sup>a</sup>

| <b>Locus</b>    | <b>SNP</b> | <b>Trait</b> | <b><i>P</i><sub>mother</sub></b> | <b><i>P</i><sub>offspring</sub></b> | <b><i>P</i><sub>combined</sub></b> |
|-----------------|------------|--------------|----------------------------------|-------------------------------------|------------------------------------|
| <i>APOA5</i>    | rs662799   | TG           | 0.032                            | 0.83                                | 1.1E-03                            |
| <i>APOA5</i>    | rs3741297  | TG           | 9.6E-03                          | 7.4E-03                             | 1.6E-04                            |
| <i>GCKR</i>     | rs780092   | TG           | 0.12                             | 0.43                                | 0.049                              |
| <i>LPL</i>      | rs328      | TG           | 0.27                             | 0.54                                | 0.16                               |
| <i>MLXIPL</i>   | rs17145738 | TG           | 0.19                             | 0.21                                | 0.071                              |
| <i>ANGPTL3</i>  | rs2131925  | TG           | 0.094                            | 0.30                                | 8.5E-03                            |
| <i>CETP</i>     | rs1800775  | HDL-C        | 0.43                             | 0.70                                | 0.72                               |
| <i>CETP</i>     | rs7499892  | HDL-C        | 0.39                             | 0.54                                | 0.67                               |
| <i>TOM1</i>     | rs138777   | HDL-C        | 0.98                             | 0.36                                | 0.94                               |
| <i>LIPC</i>     | rs588136   | HDL-C        | 0.13                             | 0.24                                | 0.071                              |
| <i>LIPC</i>     | rs1532085  | HDL-C        | 0.97                             | 0.25                                | 0.36                               |
| <i>LIPG</i>     | rs2156552  | HDL-C        | 0.78                             | 0.42                                | 0.50                               |
| <i>MMAB-MVK</i> | rs10774708 | HDL-C        | 0.73                             | 0.18                                | 0.99                               |
| <i>APOE</i>     | rs7412     | LDL-C        | 0.16                             | 0.57                                | 0.23                               |
| <i>APOE</i>     | rs769449   | LDL-C        | 0.86                             | 0.034                               | 0.024                              |
| <i>ABO</i>      | rs2519093  | LDL-C        | 0.93                             | 0.67                                | 0.46                               |
| <i>APOB</i>     | rs1367117  | LDL-C        | 0.21                             | 0.28                                | 0.32                               |
| <i>APOE</i>     | rs7412     | TC           | 0.034                            | 0.34                                | 2.5E-03                            |
| <i>TIMD4</i>    | rs6882076  | TC           | 0.96                             | 0.32                                | 0.59                               |
| <i>DNAH11</i>   | rs5008148  | TC           | 0.99                             | 0.29                                | 0.44                               |

<sup>a</sup> Results are shown for SNPs in Tables 2-4.
