# Supplementary material
Source: PubMed Central journal article supplement (PMC3793624)
Supplement: supp_P042077_jlr.P042077-6.pdf [file supp_P042077_jlr.P042077-6.pdf]

**Table S6.** Interactions between SNP and sex affecting lipid levels in the CLHNS offspring <sup>a</sup>

| <b>Locus</b>    | <b>SNP</b> | <b>Trait</b> | <b>P<sub>interaction</sub></b> |
|-----------------|------------|--------------|--------------------------------|
| <i>APOA5</i>    | rs662799   | TG           | 0.065                          |
| <i>APOA5</i>    | rs3741297  | TG           | 0.71                           |
| <i>GCKR</i>     | rs780092   | TG           | 0.99                           |
| <i>LPL</i>      | rs328      | TG           | 0.92                           |
| <i>MLXIPL</i>   | rs17145738 | TG           | 0.94                           |
| <i>ANGPTL3</i>  | rs2131925  | TG           | 0.70                           |
| <i>CETP</i>     | rs1800775  | HDL-C        | 0.46                           |
| <i>CETP</i>     | rs7499892  | HDL-C        | 0.045                          |
| <i>TOM1</i>     | rs138777   | HDL-C        | 0.079                          |
| <i>LIPC</i>     | rs588136   | HDL-C        | 0.92                           |
| <i>LIPC</i>     | rs1532085  | HDL-C        | 0.083                          |
| <i>LIPG</i>     | rs2156552  | HDL-C        | 0.27                           |
| <i>MMAB-MVK</i> | rs10774708 | HDL-C        | 0.62                           |
| <i>APOE</i>     | rs7412     | LDL-C        | 0.16                           |
| <i>APOE</i>     | rs769449   | LDL-C        | 0.32                           |
| <i>ABO</i>      | rs2519093  | LDL-C        | 0.16                           |
| <i>APOB</i>     | rs1367117  | LDL-C        | 0.33                           |
| <i>APOE</i>     | rs7412     | TC           | 0.21                           |
| <i>TIMD4</i>    | rs6882076  | TC           | 0.65                           |
| <i>DNAH11</i>   | rs5008148  | TC           | 0.21                           |

<sup>a</sup> Results are shown for SNPs in Tables 2-4.
